# Supplementary material for: Study to evaluate the effectiveness and cost-effectiveness of different screening strategies for identifying undiagnosed COPD among residents (≥40 years) in four cities in China: protocol for a multicentre cross-sectional study on behalf of the Breathe Well group
Source: PubMed Central journal article supplement (PMC7703419; doi:10.1136/bmjopen-2019-035738), 2020-11-27
Supplement: bmjopen-2019-035738supp003.pdf [file bmjopen-2019-035738supp003.pdf]

Study ID

|  |  |  |  |  |  |
|--|--|--|--|--|--|
|  |  |  |  |  |  |
|--|--|--|--|--|--|

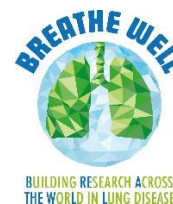

## COPD case finding study: assessment of task timing

**IMPORTANT:** Please write how long each task takes in minutes.

### Assessment station 1 – NO TIMING REQUIRED

### Assessment station 2

*Please only note the time for standing height (not arm span or weight)*

Standing height

start time \_\_\_\_\_

end time \_\_\_\_\_

|  |  |
|--|--|
|  |  |
|--|--|

minutes

### Assessment station 3

Pre-bronchodilator peak flow

start time \_\_\_\_\_

end time \_\_\_\_\_

|  |  |
|--|--|
|  |  |
|--|--|

minutes

Pre-bronchodilator microspirometry

start time \_\_\_\_\_

end time \_\_\_\_\_

|  |  |
|--|--|
|  |  |
|--|--|

minutes

### Assessment station 4

Administration of Salbutamol

start time \_\_\_\_\_

end time \_\_\_\_\_

|  |  |
|--|--|
|  |  |
|--|--|

minutes

### Assessment station 5

Completion of Lung Health questionnaire (CDQ etc)

start time \_\_\_\_\_

end time \_\_\_\_\_

|  |  |
|--|--|
|  |  |
|--|--|

minutes

Did the patient require assistance?

Yes

No

If yes, was assistance required for the whole questionnaire?

Yes

No

### Assessment station 6

Post-bronchodilator spirometry

start time \_\_\_\_\_

end time \_\_\_\_\_

|  |  |
|--|--|
|  |  |
|--|--|

minutes
