# Supplementary material for: Study to evaluate the effectiveness and cost-effectiveness of different screening strategies for identifying undiagnosed COPD among residents (≥40 years) in four cities in China: protocol for a multicentre cross-sectional study on behalf of the Breathe Well group
Source: PubMed Central journal article supplement (PMC7703419; doi:10.1136/bmjopen-2019-035738), 2020-11-27
Supplement: bmjopen-2019-035738supp004.pdf [file bmjopen-2019-035738supp004.pdf]

# 北京大学第一医院生物医学研究伦理委员会审查批件

伦理审查编号: (2018) 科研第 (141) 号-修正案

EC 存档档案号: 2018 研 141

伦理委员会批准日期: 2018 年 11 月 07 日 批件有效期至: 2019 年 11 月 06 日 定期跟踪审查频率: 12 个月

|                                                                                                                                                                                                                                         |                                                                                                                                                                                                                                                                                                                                                                                                                                                                                                                                                                                                                                                                                 |       |     |
|-----------------------------------------------------------------------------------------------------------------------------------------------------------------------------------------------------------------------------------------|---------------------------------------------------------------------------------------------------------------------------------------------------------------------------------------------------------------------------------------------------------------------------------------------------------------------------------------------------------------------------------------------------------------------------------------------------------------------------------------------------------------------------------------------------------------------------------------------------------------------------------------------------------------------------------|-------|-----|
| 项目名称                                                                                                                                                                                                                                    | 慢性阻塞性肺疾病不同筛查策略在中国四个城市 $\geq 40$ 岁人群中的有效性及成本-效益的评价性研究-横断面研究                                                                                                                                                                                                                                                                                                                                                                                                                                                                                                                                                                                                                      |       |     |
| CFDA 批件号                                                                                                                                                                                                                                | /                                                                                                                                                                                                                                                                                                                                                                                                                                                                                                                                                                                                                                                                               |       |     |
| 申办者                                                                                                                                                                                                                                     | 北京大学第一医院 健康管理中心                                                                                                                                                                                                                                                                                                                                                                                                                                                                                                                                                                                                                                                                 |       |     |
| 临床研究科室                                                                                                                                                                                                                                  | 健康管理中心                                                                                                                                                                                                                                                                                                                                                                                                                                                                                                                                                                                                                                                                          | 主要研究者 | 迟春花 |
| 批准的文件                                                                                                                                                                                                                                   | 1、研究方案 (版本号: 6 版本日期: 2018.10.25)<br>2、知情同意书 (版本号: 6.0 版本日期: 2018.10.25)<br>3、研究对象信息表 (版本号: v1 版本日期: 2018.10.19)<br>4、肺部健康问卷 (版本号: 1.0 版本日期: 2018.5.9)<br>5、调查问卷 (版本号: v7 版本日期: 2018.10.4)<br>6、中国案例报告表 (版本号: Version3 版本日期: 2018.10.25)                                                                                                                                                                                                                                                                                                                                                                                                                                         |       |     |
| 本伦理委员会的人员组成和工作程序符合中国 GCP 以及国家相关规定                                                                                                                                                                                                       |                                                                                                                                                                                                                                                                                                                                                                                                                                                                                                                                                                                                                                                                                 |       |     |
| 伦理审查方式:                                                                                                                                                                                                                                 | ■快速审查 审查时间: 2018 年 11 月 07 日                                                                                                                                                                                                                                                                                                                                                                                                                                                                                                                                                                                                                                                    |       |     |
| 审查委员                                                                                                                                                                                                                                    | 张宝妮 谢鹏雁                                                                                                                                                                                                                                                                                                                                                                                                                                                                                                                                                                                                                                                                         |       |     |
| 审查意见                                                                                                                                                                                                                                    | 同意按照上述批准的文件进行该临床试验。                                                                                                                                                                                                                                                                                                                                                                                                                                                                                                                                                                                                                                                             |       |     |
| 注意事项:                                                                                                                                                                                                                                   | <ol style="list-style-type: none"> <li>1. 本项临床试验应当在伦理委员会同意进行之日起 1 年内实施。逾期未实施的, 本审查批件自行废止。</li> <li>2. 研究应遵循本伦理委员会批准的方案执行, 须符合 GCP 和《赫尔辛基宣言》的原则。</li> <li>3. 自同意研究之日起, 每隔 12 个月伦理委员会的定期跟踪审查 (审查频度可能根据实际进展情况改变); 请在定期跟踪审查到期前 1 个月递交《定期跟踪审查表》。</li> <li>4. 研究过程中, 对研究方案和知情同意书等相关文件所作的任何修改, 请交《修正案申请表》及“送审文件清单”中规定相关资料, 并得到伦理委员会审查同意该修正后方可实施。</li> <li>5. 发生严重不良事件或影响研究风险受益比的非预期不良事件, 在向 CFDA 上报的同时向伦理委员会作书面通报, 可以使用 CFDA 的《严重不良事件报告表》或本伦理委员会公布的《严重不良事件/非预期不良事件报告表》或其他有相关内容的报告表, 但外文的报告需要有中文摘要。伦理委员会有权根据对其评估做出新的决定。</li> <li>6. 不依从或违反方案应及时提交《不依从或违反方案报告表》。</li> <li>7. 提前终止研究应及时提交《研究方案提前终止报告表》。</li> <li>8. 研究完成后提交《研究总结报告表》和临床试验总结报告。</li> <li>9. 及时书面报告其他伦理委员会的重要决定。</li> </ol> |       |     |
| 主任委员或副主任委员签名: <br>北京大学第一医院生物医学研究伦理委员会 (盖章)<br><br>2018 年 11 月 7 日 |                                                                                                                                                                                                                                                                                                                                                                                                                                                                                                                                                                                                                                                                                 |       |     |

伦理委员会地址: 北京市西城区大红罗厂街 6 号 邮编: 100034 联系电话: 010-66119025
